# Supplementary material for: Machine Learning Enables Accurate Prediction of Asparagine Deamidation Probability and Rate
Source: PubMed Central journal article supplement — Mol Ther Methods Clin Dev. 2019 Oct 1;15:264–74. doi: 10.1016/j.omtm.2019.09.008 (PMC6923510; doi:10.1016/j.omtm.2019.09.008), 2019-10-01
Supplement: mmc1.pdf [file mmc1.pdf]

**OMTM, Volume 15**

**Supplemental Information**

**Machine Learning Enables**

**Accurate Prediction of Asparagine**

**Deamidation Probability and Rate**

**Jared A. Delmar, Jihong Wang, Seo Woo Choi, Jason A. Martins, and John P. Mikhail**

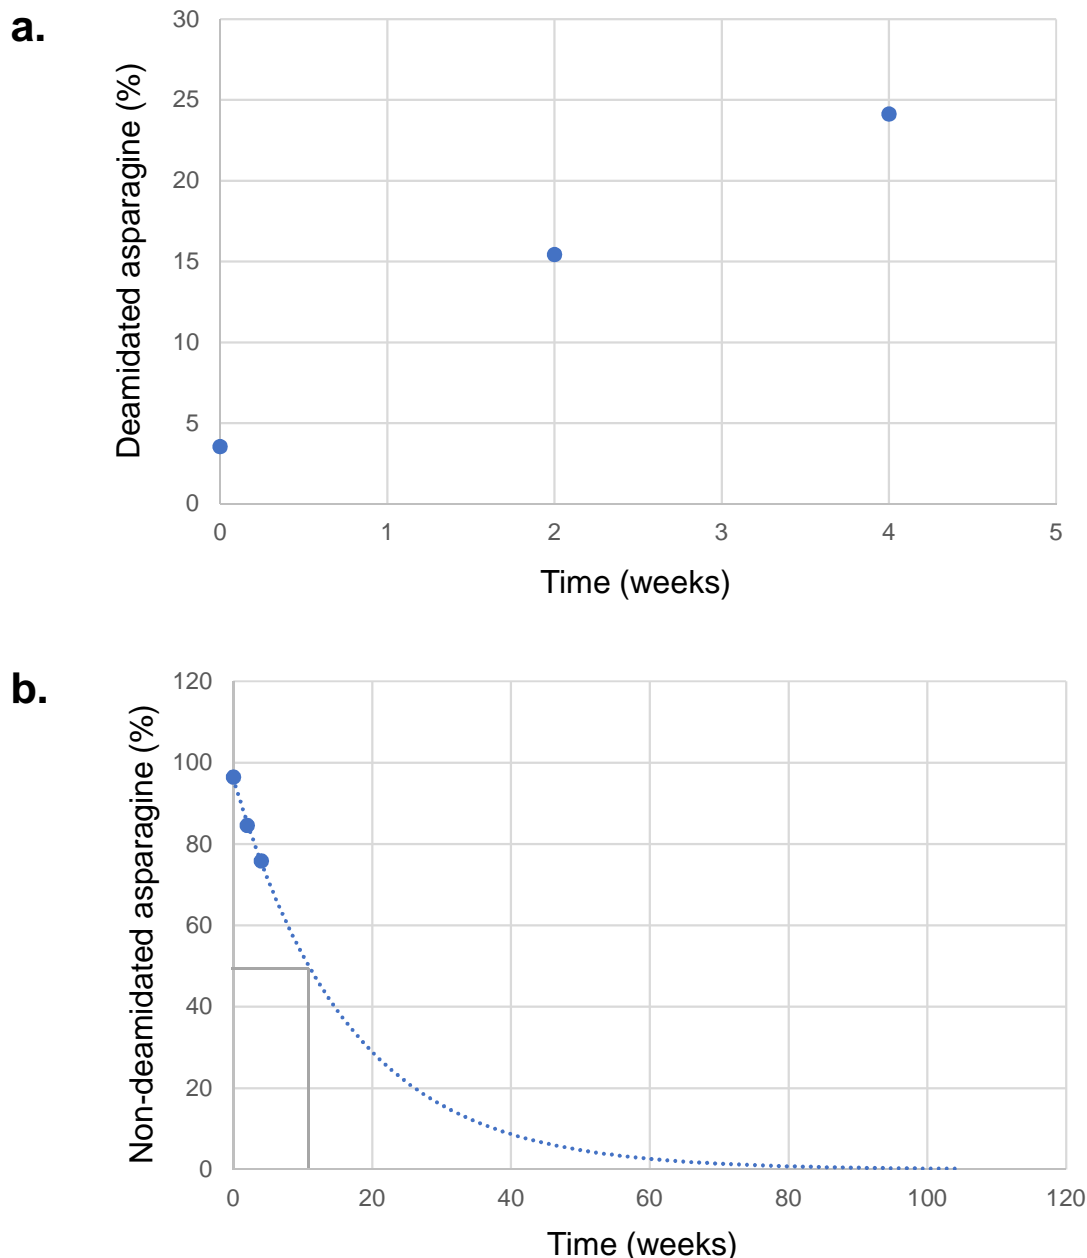

**Supplemental Figure 1. Calculation of site-specific asparagine deamidation half-life from from LC-MS/MS deamidation abundance.** (a) Deamidation abundance for each asparagine in our training set molecules were measured by LC-MS/MS as the sum of aspartic acid and iso-aspartic acid products after 0, 2, and 4 week timepoints at stress conditions (blue dots). (b) The deamidation half-life of each site was calculated by a least squares fit to the abundance of non-deamidated asparagines versus time in weeks (blue dotted line). The half-life ( $t_{1/2}$ ) is the time in weeks for deamidation to reach 50% (in this case 11.5 weeks, indicated by grey lines).

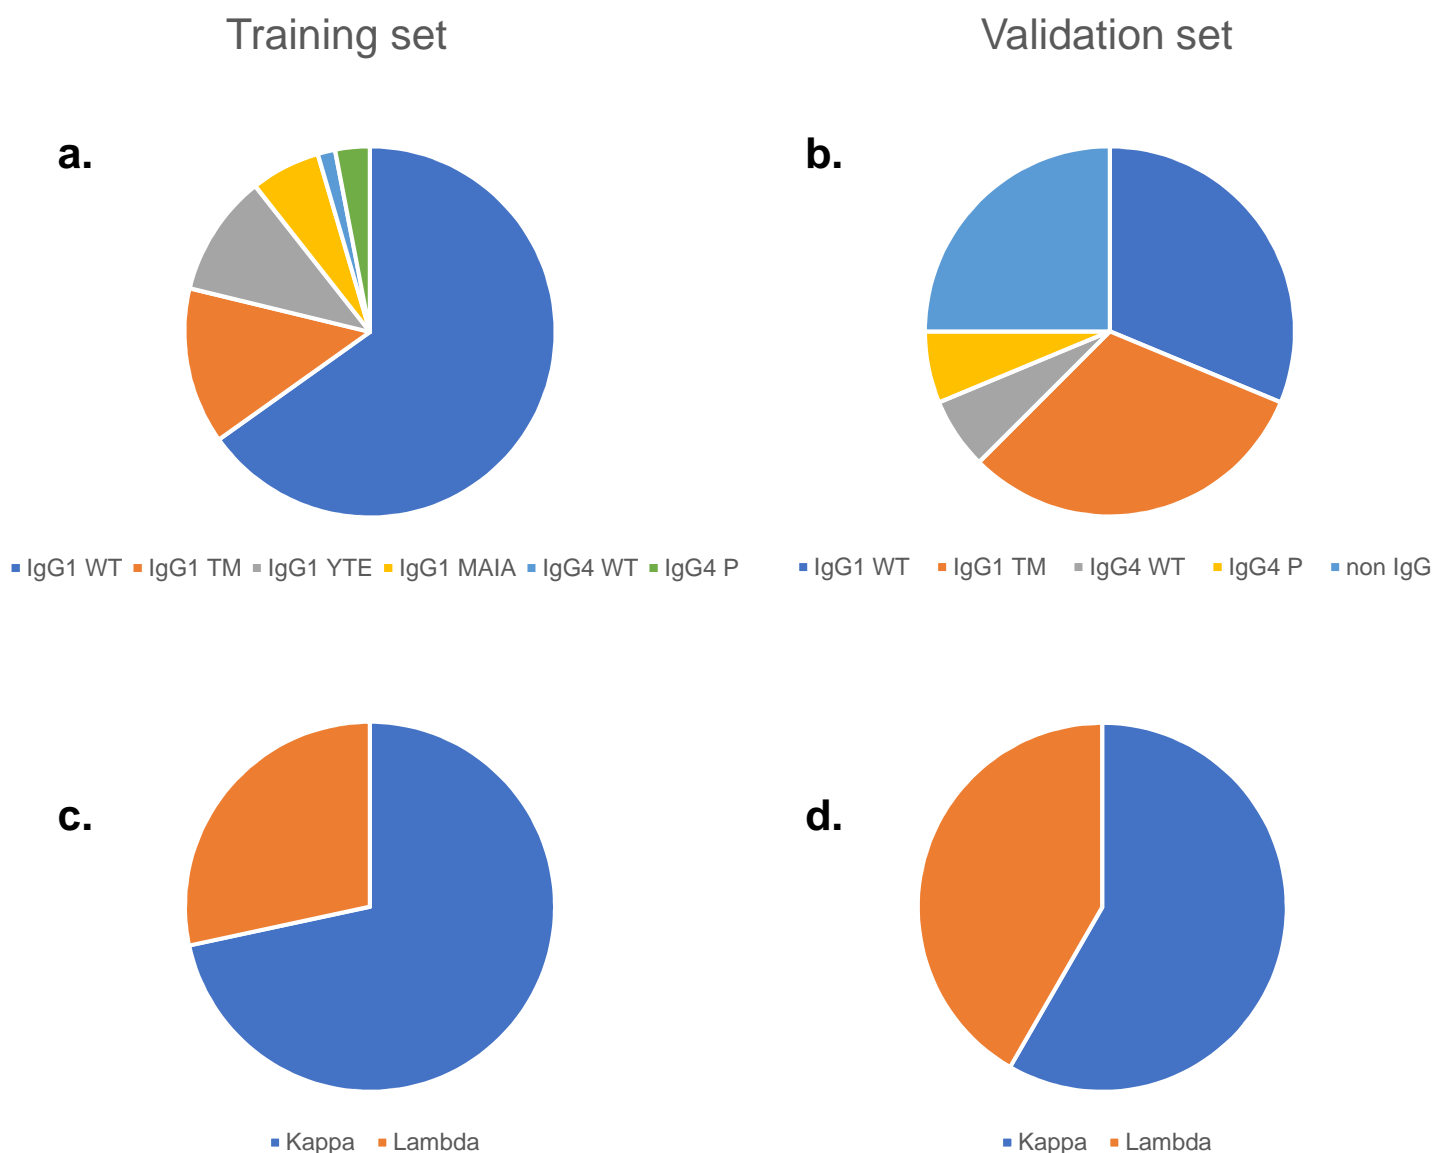

**Supplemental Figure 2. Training and validation data set distribution.** Distribution of IgG formats and non-IgG formats in (a) the training set and (b) the validation set. There are a total of 64 IgG1s, with 6 unique heavy chain formats, and 3 IgG4s, with 2 unique heavy chain formats, in the training set. The validation set contains 10 IgG1s and 2 IgG4s, with 2 unique heavy chain formats each, and 4 non-mAb proteins. Among IgGs, the light chain constant region format distribution is shown for (c) the training set and (d) the validation set.

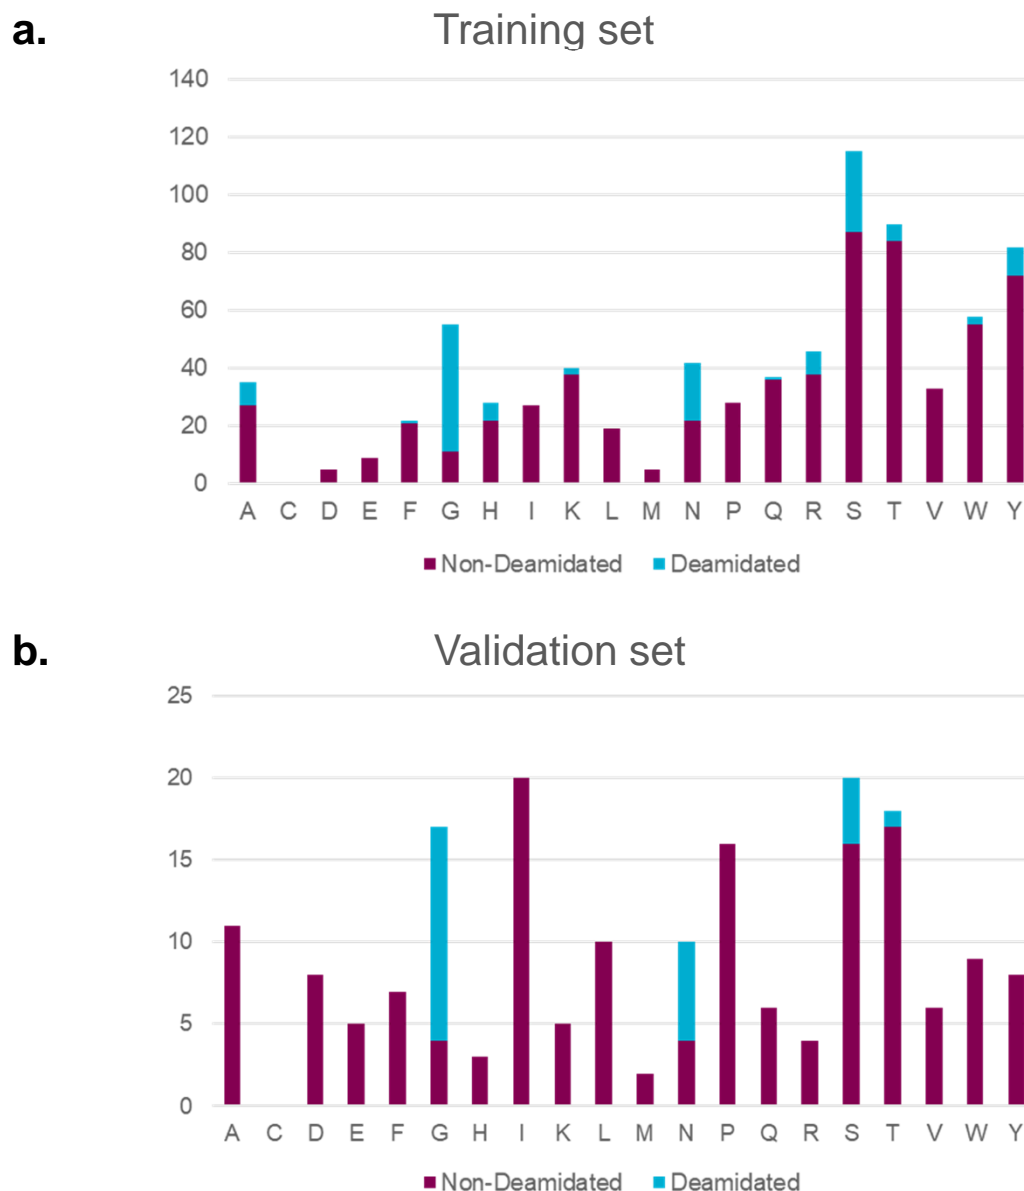

**Supplemental Figure 3. Distribution of deamidation frequency in training and validation sets.** The number of asparagines is plotted versus the N+1 residue for (a) the training data set and (b) the independent validation set. In each case, the number of non-deamidated asparagines observed is colored maroon and the number of deamidated sites is colored cyan. For the training set, the fraction of deamidated sites where N+1 = G, N, or S, was 80%, 48%, and 24%, respectively; whereas in the validation set, we observed 76%, 40%, and 20%, respectively.

**a.**

| Prediction →<br>Experiment ↓ | Positive | Negative |
|------------------------------|----------|----------|
| Positive                     | 17       | 9        |
| Negative                     | 5        | 164      |

**b.**

| Prediction →<br>Experiment ↓ | Positive | Negative |
|------------------------------|----------|----------|
| Positive                     | 25       | 1        |
| Negative                     | 26       | 143      |

**c.**

| Statistic                 | Categorical model | NG/NN/NS |
|---------------------------|-------------------|----------|
| Accuracy                  | 92.8%             | 86.2%    |
| MCC                       | 0.671             | 0.625    |
| Precision                 | 77.3%             | 49.0%    |
| Recall                    | 65.4%             | 96.2%    |
| Specificity               | 97.0%             | 84.6%    |
| Negative Predictive Value | 94.8%             | 99.3%    |
| Miss Rate                 | 34.6%             | 3.8%     |
| Fallout                   | 22.7%             | 51.0%    |
| False Discovery Rate      | 3.0%              | 15.4%    |
| False Omission Rate       | 5.2%              | 0.7%     |

**Supplemental Table 1. Comparison of predictions made by the categorical model and the simple (NG/NN/NS) model on the independent validation set.** (a) Confusion matrix for our categorical model; (b) confusion matrix for the NG/NN/NS model; and (c) statistics calculated for both the categorical and NG/NN/NS models.

**a.**

| Prediction →<br>Experiment ↓ | Positive | Negative |
|------------------------------|----------|----------|
| Positive                     | 137      | 0        |
| Negative                     | 0        | 639      |

**b.**

| Prediction →<br>Experiment ↓ | Positive | Negative |
|------------------------------|----------|----------|
| Positive                     | 92       | 45       |
| Negative                     | 120      | 519      |

**c.**

| Statistic                 | Categorical model | NG/NN/NS |
|---------------------------|-------------------|----------|
| Accuracy                  | 100.0%            | 43.4%    |
| MCC                       | 1.000             | 0.672    |
| Precision                 | 100.0%            | 81.2%    |
| Recall                    | 100.0%            | 92.0%    |
| Specificity               | 0.0%              | 32.8%    |
| Negative Predictive Value | 0.0%              | 56.6%    |
| Miss Rate                 | 0.0%              | 18.8%    |
| Fallout                   | 0.0%              | 8.0%     |
| False Discovery Rate      | 100.0%            | 78.7%    |
| False Omission Rate       | 100.0%            | 41.4%    |

**Supplemental Table 2. Comparison of predictions made by the categorical model and the conventional (NG/NN/NS) model on the training set.** (a) Confusion matrix for our categorical model; (b) confusion matrix for the NG/NN/NS model; and (c) statistics calculated for both the categorical and NG/NN/NS models.

**a.**

| Training set                              | mAbs     |                  | non-mAbs          |                     |
|-------------------------------------------|----------|------------------|-------------------|---------------------|
|                                           | In-house | Lu <i>et al.</i> | Jia <i>et al.</i> | Giles <i>et al.</i> |
| All asparagines;<br>Deamidated / Total    | 98 / 608 | 39 / 168         | 0/0               | 0/0                 |
| Unique asparagines;<br>Deamidated / Total | 49 / 304 | 39 / 168         | 0/0               | 0/0                 |

**b.**

| Validation set                            | mAbs     |                  | non-mAbs          |                     |
|-------------------------------------------|----------|------------------|-------------------|---------------------|
|                                           | In-house | Lu <i>et al.</i> | Jia <i>et al.</i> | Giles <i>et al.</i> |
| All asparagines;<br>Deamidated / Total    | 9 / 68   | 0 / 0            | 7 / 80            | 10 / 47             |
| Unique asparagines;<br>Deamidated / Total | 9 / 68   | 0 / 0            | 7 / 80            | 10 / 47             |

**c.**

| Non-mAb validation subset                 | mAbs     |                  | non-mAbs          |                     |
|-------------------------------------------|----------|------------------|-------------------|---------------------|
|                                           | In-house | Lu <i>et al.</i> | Jia <i>et al.</i> | Giles <i>et al.</i> |
| All asparagines;<br>Deamidated / Total    | 0 / 0    | 0 / 0            | 7 / 80            | 0 / 0               |
| Unique asparagines;<br>Deamidated / Total | 0 / 0    | 0 / 0            | 7 / 80            | 0 / 0               |

**d.**

| mAb-only validation subset                | mAbs     |                  | non-mAbs          |                     |
|-------------------------------------------|----------|------------------|-------------------|---------------------|
|                                           | In-house | Lu <i>et al.</i> | Jia <i>et al.</i> | Giles <i>et al.</i> |
| All asparagines;<br>Deamidated / Total    | 9 / 68   | 0 / 0            | 0 / 0             | 0 / 0               |
| Unique asparagines;<br>Deamidated / Total | 9 / 68   | 0 / 0            | 0 / 0             | 0 / 0               |

**Supplemental Table 3. Data sources and description.** Number of total, deamidated, and unique asparagines for (a) complete training data set, (b) complete validation data set, (c) non-mAb validation data subset, (d) mAb-only validation data subset. Non-unique asparagines in the training set mAbs have a nearly identical site on the opposite heavy or light chain, as the full IgG homology model was generate for in-house molecules. Our regression model was trained and validated only on the deamidated data within each set.
